# Supplementary material
Source: publisher figshare collection journal article supplement (https://karger.figshare.com/articles/dataset/_/5124577)
Supplement: Supplementary file 2 [file 1]

Archive with 3 entries (3 files):
- 000346846_sm_KARGER_OLA.PDF
- 000346846_sm_Suppl._Material.doc
- 000346846_sm_Suppl._Material.PDF
